# Supplementary material for: Preoperative fibrinogen level predicts the risk and prognosis of patients with native valve infective endocarditis undergoing valve surgery
Source: PeerJ. 2024 Sep 25;12:e18182. doi: 10.7717/peerj.18182 (PMC11438427; doi:10.7717/peerj.18182)
Supplement: Supplemental Information 1 [file peerj-12-18182-s001.xlsx]

## Sheet: Raw Data
Patient number	Gender（1,male;2,female）	Age(years)	Height(m)	Weight(kg)	BMI	Hospital stay(days)	Valve involvement	Valve Surgery（1,Single;2,Multiple）	Blood Culture	Microorganisms	WBC(10^9/L)	HB(g/L)	ALB(g/L)	ALT(IU/L)	AST(IU/L)	CREA(umol/L)	LVEF(%)	Hypertension	Fever	Splenomegaly	Embolic event	PT(sec)	APTT(sec)	PT-INR	PTA(%)	TT(sec)	FBG(g/L)	PLT(10^9/L)	D-dimer（mg/L）	30-days death	1-year death	All-cause death	Survival days
001	2	78	1.49	49.1	22.1161	18	Mitral valve	2	positive	Staphylococcus	11.08	95	28.1	6.4	19.9	55.4	65	0	1	0	0	13.5	29.5	1.19	77	13.5	4.11	141		0	0	0	594
002	1	52	1.64	44	16.3593	58	Mitral valve	1	negative		7.89	129	41.7	9.2	12.2	58.4	66	0	1	0	1	12.3	38.5	1.12	64	13.6	5.87	162		0	0	0	602
003	1	44	1.7	60	20.7612	20	Mitral valve	2	negative		9.68	128	37.6	13.2	12.7	80.1	67	0	0	1	0	20.8	29.9	1.84	88	12.5	6.94	306	0.251	0	0	0	600
004	2	57	1.54	53	22.3478	24	Aortic valve	2	negative		5.92	118	39.9	37.5	31.4	70.4	62	0	1	0	0	12.3	34.7	1.12	46	13.2	5.08	124		0	0	0	614
005	1	56	1.63	73	27.4756	37	Aortic valve	2	negative		6.88	153	39.8	32.8	24	88.7	41	0	0	0	0	12.9	29.3	1.17	86	12.9	3.68	79		0	0	0	628
006	1	57	1.655	70	25.5565	32	Mitral valve	2	negative		3.19	71	33	10.2	18	84.9	58	1	0	1	0	12.4	31.7	1.13	83	16.8	3.72	148		0	0	0	623
007	2	39	1.596	49.7	19.5115	15	Mitral valve	1	negative		9.66	94	35.4	11.8	12.8	92.9	62	0	1	0	0	16.2	28	1.43	14	14.3	5.33	236		0	0	0	641
008	1	70	1.5	46	20.4444	40	Aortic valve	2	negative		5.21	89	34.6	22	20.3	151.5	63	0	0	0	0	11.1	27.5	1.01	80	18.4	1.91	194	0.432	0	0	0	637
009	2	58	1.495	62.5	27.9639	12	Mitral valve	2	positive	Candida	7.61	126	39.4	57.4	49.5	79.2	55	0	0	0	0	15.1	34.6	1.38	73	13.7	3.98	123		0	0	0	655
010	1	52	1.69	70	24.5089	15	Aortic valve	1	negative		6.05	129	43.6	10.1	15.8	118.2	64	0	1	0	0	11.7	36.4	1.06	110	15.6	2.63	97		0	0	0	682
011	1	47	1.62	56.1	21.3763	17	Mitral valve	2	positive	Streptococcus	19.16	104	32	14.2	13.4	112.3	65	0	1	1	0	11.6	27.2	1.05	135	14.6	3.67	132		0	0	0	690
012	1	51	1.73	75	25.0593	17	Tricuspid valve	1	positive	Streptococcus	11.38	91	31.5	90.4	40	122	67	0	1	0	0	13.1	27	1.19	75	16	5.23	263	0.974	0	0	0	685
013	2	45	1.5	53	23.5556	28	Aortic valve	2	negative		10.82	125	29.1	131.7	106.8	67	47	0	0	0	0	15.5	25.9	1.4	52	12.8	5.01	270		0	0	0	691
014	1	26	1.73	60.6	20.2479	19	Aortic valve	2	positive	Streptococcus	7.79	132	41.5	15.2	24.7	65.1	65	0	0	1	0	17.4	36.6	1.57	45	14.1	4.49	80	1.664	0	0	0	698
015	2	42	1.49	45.3	20.4045	23	Pulmonary valve	1	positive	Abiotrophia defectiva	3.25	82	27.8	8.3	29.7	90.7	54	0	0		0	13	31.7	1.18	77	15.6	3.37	109		0	0	0	710
016	1	58	1.59	76.1	30.1017	19	Aortic valve	2	negative		9.18	88	36.4	16.6	14	105.2	60	0	1	0	0	12	31.1	1.09	76	13.5	5.19	217		0	0	0	710
017	1	57	1.6	52	20.3125	41	Aortic valve	2	negative		8.79	119	37.7	17.2	38.4	97.6	61	1	0	0	0	15.3	31.2	1.34	96	17.9	2.89	80	0.549	0	0	0	692
018	1	47	1.7	64	22.1453	22	Aortic valve	2	negative		8.37	85	27.2	36.6	42.2	87.4	65	0	1	1	0	19.8	43.5	1.79	64	17.6	1.79	95		0	0	0	711
019	1	57	1.66	81.2	29.4673	17	Mitral valve	2	negative		7.56	134	39.2	15.5	18.7	89.5	65	0	1	0	0	13.3	36.7	1.21	90	14.7	3.4	132		0	0	0	725
020	1	47	1.817	72	21.8083	14	Aortic valve	2	positive	Enterococcus	17.12	87	26	15.8	15.8	82.6	60	0	1	0	0	13	29.1	1.18	79	17.4	3.54	102	1.27	0	0	0	880
021	1	45	1.8	48.8	15.0617	14	Mitral valve	1	negative		4.9	149	44.6	15.4	7.9	70.4	57	0	0	1	0	12.5	40	1.13	88	15	1.86	175		0	0	0	740
022	1	38	1.67	55.5	19.9003	19	Mitral valve	2	negative		7.08	138	41.6	43.4	45.9	73.5	54	0	0	0	0	12.2	33	1.11	65	13.1	4.6	174		0	0	0	747
023	1	25	1.765	60.7	19.4849	35	Mitral and Aortic valve	1	negative		3.26	75	23	11.8	27.3	74	56	0	0	1	0	10.4	30.9	0.95	133	17.6	2.16	101	0.192	0	0	0	752
024	2	65	1.5	45	20	18	Aortic valve	2	negative		22.9	122	35.2	44.8	30.7	74	56	0	1	0	0	12.9	26	1.17	81	13	3.28	313		0	0	0	769
025	1	30	1.75	69.9	22.8245	17	Aortic valve	1	negative		8.64	121	37.8	16.3	10.8	70.3	65	0	1	0	0	13.2	31	1.2	73	12.3	5.27	138		0	0	0	775
026	1	65	1.56	54	22.1893	29	Aortic valve	1	negative		5.75	117	40	24.6	36.7	80.8	60	0	0	0	0	12.2	29.5	1.11	90	15.9	2.52	180	0.973	0	0	0	774
027	1	32	1.65	67.1	24.6465	13	Aortic valve	1	negative		10.99	108	40.4	81.8	50	95.6	67	0	0	0	0	13	33.6	1.18	79	13.7	3.99	221	1.133	1	1	1	1
028	1	32	1.73	58	19.3792	33	Mitral valve	1	positive	Streptococcus	8.42	113	33.2	56.5	28.7	74.3	70	0	1	0	0	15.5	32.1	1.4	82	14.3	3.45	278		0	0	0	789
029	2	56	1.56	68.7	28.2298	21	Aortic valve	1	negative		8.57	100	37.1	16.9	21.6	62.8	66	0	1	0	0	11.6	28	1.05	97	16.4	4.62	298		0	0	0	803
030	1	62	1.69	55.9	19.5721	21	Mitral valve	1	negative		5.13	88	34.7	13.2	22	61.4	68	0	1	0	0	11.6	33.7	1.05	92	15.6	3.92	218		0	0	0	802
031	1	52	1.7	80	27.6817	46	Mitral and Aortic valve	2	negative		19	119	32.2	29.4	22.58	228	61	0	1	0	0	13.8	30.4	1.21	77	18	2.28	161	1.047	0	0	0	802
032	1	46	1.71	65	22.2291	23	Pulmonary valve	1	negative		10.52	127	40.8	16.6	21.3	80	62	0	1	0	0	12.5	28.6	1.13	81	13.4	3.6	115	0.781	0	0	0	811
033	1	38	1.67	64	22.9481	29	Mitral and Aortic valve	2	positive	Streptococcus	7.94	111	33.9	15.3	13.6	97.5	59	0	1	1	0	12.3	26.9	1.11	90	15.5	3.84	109		0	0	0	816
034	1	40	1.72	70	23.6614	24	Aortic valve	1	positive	Candida	8.62	56	28.6	5.4	20	283.9	39	0	1		0	11.6	28.7	1.05	92	15.5	2.75	84		1	1	1	30
035	1	46	1.73	78.3	26.1619	20	Aortic valve	2	negative		10.08	123	37.8	35.4	25.4	119.4	61	0	1	0	0	11.9	29.8	1.08	87	13.5	3.89	284		0	0	0	832
036	2	56	1.59	45	17.7999	29	Aortic valve	1	negative		12.57	83	29.3	8.3	21.1	70.9	73	0	0	0	0	11.8	30.5	1.07	101	13.5	4.85	250		0	0	0	840
037	2	56	1.65	66	24.2424	50	Aortic valve	1	negative		10.52	89	36.6	50.3	36	57.6	70	1	1		0	13.3	33.4	1.21	85	14.9	3.96	200	0.813	0	0	0	825
038	1	61	1.6	58	22.6562	21	Aortic valve	2	negative		11.76	98	27.6	35	13.8	79.7	69	0	0		1	14	27.9	1.26	91	15.1	5.15	382	0.376	0	0	0	854
039	1	61	1.64	49	18.2183	33	Tricuspid valve	1	negative		11.47	140	38.4	37.1	24.4	85.7	57	0	1	0	0	12.3	29.8	1.11	86	15.9	2.24	128	41.841	0	0	0	858
040	1	57	1.75	85	27.7551	31	Aortic valve	1	negative		6.75	74	29.3	56.6	49.3	125.1	59	0	0		0	13.3	33	1.2	76	38.3	1.79	83		0	0	0	865
041	2	48	1.58	50.8	20.3493	29	Aortic valve	2	positive	Streptococcus	14.47	115	34.6	15.3	28.4	71.7	60	0	0	0	0	13.7	29.9	1.24	73	13.6	4.6	193		0	0	0	868
042	2	43	1.61	56.8	21.9127	13	Mitral valve	1	positive	Granulicatella adiacens	14.13	99	30.4	7.9	14.6	48	72	0	0		0	13.8	29.6	1.25	72	16.1	4.15	392		0	0	0	866
043	1	53	1.68	59.2	20.9751	10	Tricuspid valve	2	negative		7.37	130	38.9	35.2	23.4	78.5	59	0	1	0	0	11.5	33	1.04	94	15.6	3.6	244		0	0	0	878
044	1	51	1.64	76.8	28.5544	20	Mitral valve	2	negative		9.72	161	37.1	67.2	48.9	170.7	62	1	0	0	0	11.1	28.2	1.01	100	15.2	3.28	177		0	0	0	891
045	1	55	1.76	74.5	24.0509	23	Mitral and Aortic valve	2	positive	Streptococcus	14.17	92	27.7	189.2	196.1	54.4	67	0	1	1	0	15.1	31.6	1.36	64	15.1	4.67	299		0	0	0	889
046	1	35	1.74	64.4	21.271	12	Aortic valve	1	positive	Granulicatella adiacens	10.69	117	40.2	10.2	13	68.7	64	0	1	1	0	12.8	28.6	1.16	81	14.9	3.36	265		0	0	0	892
047	1	58	1.56	53.3	21.9017	20	Aortic valve	2	negative		13.15	88	30.9	55.4	41.6	90.3	65	0	1	0	0	13.3	30	1.2	76	15.1	4.45	446		0	0	0	916
048	1	56	1.62	53.6	20.4237	14	Mitral valve	1	positive	Streptococcus	10.87	116	37.6	17.5	15.6	62.5	58	0	0	0	0	13.1	31.8	1.18	79	14.2	4.93	203		0	0	0	919
049	1	47	1.67	66	23.6652	24	Aortic valve	1	positive	Streptococcus	10.96	96	27.7	25	25.1	67.3	69	0	0	0	0	14.5	31.7	1.26	67	13.5	3.58	243		0	0	0	928
050	1	34	1.71	64	21.8871	13	Aortic valve	1	positive	Streptococcus	9.95	109	31.8	48.9	38.5	84.4	67	0	0	1	0	15.6	31.3	1.4	61	17.8	2.86	129		0	0	0	931
051	2	64	1.51	49.9	21.885	20	Mitral valve	2	positive	Candida	9.26	105	31.3	12.9	46	77.1	68	0	0	0	0	12	36.3	1.05	90	16.5	4.16	131		0	0	0	959
052	1	45	1.74	70	23.1206	23	Mitral and Aortic valve	2	negative		9.57	89	32.6	14.5	14.3	112.5	73	1	0	1	0	11.3	33.3	0.99	99	14.5	4.88	361	0.99	0	0	0	951
053	1	53	1.65	55	20.202	21	Aortic valve	2	positive	Staphylococcus	16.2	128	37.2	42.1	33.3	73.6	60	1	1	0	0	13.6	27.5	1.19	74	13.9	6.17	225	0.578	0	0	0	948
054	1	25	1.73	80.6	26.9304	24	Aortic valve	2	negative		8.75	117	39.2	17.2	14.6	95.1	60	0	1	0	0	12.7	38.5	1.15	82	16	2.7	183		0	0	0	966
055	1	34	1.7	62.5	21.6263	22	Mitral valve	1	negative		12.98	141	38.6	77.9	33.1	59.1	58	1	0	0	0	10.8	29.9	0.98	104	15.2	2.69	375		0	0	0	972
056	1	53	1.66	53	19.2336	14	Aortic valve	2	negative		6.7	134	30	14.6	17.9	120.5	61	0	0	0	0	12.6	35.7	1.1	85	15.5	3.3	258		0	0	0	987
057	1	43	1.65	55	20.202	21	Mitral and Aortic valve	2	positive	Streptococcus	19.3	90	30.4	636.8	897.5	117.7	39	0	1	0	1	21.7	33.3	1.93	39	17.4	2.63	160	2.12	0	0	0	988
058	1	26	1.6	46	17.9688	26	Mitral valve	2	negative		13.6	104	35.4	53.8	87.6	117.7	66	0	0	0	0	13.8	34.3	1.25	78	16.3	3.36	139		0	0	0	986
059	1	64	1.625	63.6	24.0852	21	Aortic valve	2	negative		5.29	68	30	7.7	13.3	139.5	59	0	0	1	0	13.3	34.3	1.2	98	17.2	3.67	130		0	0	0	992
060	1	51	1.67	56	20.0796	24	Mitral valve	1	positive	Gemella	7.86	66	27.2	7.5	6.8	259.4	61	1	0	0	0	11.5	27.7	1.04	95	17.7	3.66	172		0	0	0	993
061	2	19	1.52	55.5	24.0218	33	Aortic valve	2	negative		3.73	103	39	38.7	119.8	75.4	57	0	0	0	0	18.1	31.9	1.62	50	18.4	1.97	82		0	0	0	992
062	2	34	1.705	51.1	17.5781	15	Tricuspid valve	1	negative		2.94	115	36.9	8.7	29.5	52.2	63	0	0	0	0	13.4	31.9	1.17	77	14.6	3.12	165		0	0	0	1008
063	1	46	1.6	75	29.2969	18	Aortic valve	1	negative		7.95	155	41.9	26.8	17.6	89.5	65	1	0	0	0	11.1	35.9	0.97	105	14.1	3.55	210		0	1	1	205
064	2	50	1.62	70.7	26.9395	16	Mitral valve	1	negative		7.6	112	7.6	13.3	8.9	44.1	64	1	1	0	1	11.2	33	1.02	95	13.8	3.86	522		0	0	0	1015
065	1	28	1.7	45	15.5709	15	Mitral and Aortic valve	2	negative		12.98	88	43.6	724.5	113.7	53.9	51	0	1	0	0	12	21.1	1.05	92	11.4	3.74	213		0	0	0	1039
066	1	47	1.8	71	21.9136	21	Aortic valve	1	positive	Streptococcus	5.79	130	40.5	30.4	25.3	81	63	0	0	0	0	11.3	26.3	1.03	95	16.8	3.24	138		0	0	0	1036
067	1	42	1.68	55	19.487	25	Mitral valve	1	positive	Streptococcus	8.04	66	26.6	66.8	54.8	70.9	72	0	0	1	0	16.1	35.9	1.41	59	16.3	3.78	88	3.78	0	0	0	1042
068	1	58	1.74	82	27.0842	17	Aortic valve	1	negative		6.61	126	39.8	21	14.8	70.2	51	0	0	0	0	10.7	33	0.97	110	14.2	3.98	228	0.085	0	1	1	91
069	1	63	1.575	55.2	22.2525	25	Aortic valve	1	negative		14.13	114	32.9	1098.4	1638.4	105.1	57	0	0	0	0	20.8	27	1.88	39	16.5	2.41	134	0.843	0	0	0	1057
070	1	42				46	Mitral valve	1	negative		19.96	92	40.1	77.7	44.8	74.8	65	0	1	0	0	14.6	24.4	1.28	68	14.2	6.03	266	1.128	0	0	0	1054
071	2	55	1.575	53.4	21.5268	20	Aortic valve	2	negative		7.38	140	42.2	19.2	26.5	99.9	64	0	0	0	0	12.7	32.2	1.15	84	14.6	2.58	205	0.202	0	0	0	1055
072	1	49	1.77	63.5	20.2688	13	Aortic valve	2	negative		11.31	134	31.6	19.2	22.4	67.1	64	0	0	0	1	13.8	28	1.21	74	13.9	7.1	305	1.011	0	0	0	1062
073	1	49	1.61	50	19.2894	13	Mitral valve	1	negative		7.31	111	42	14.7	26.3	74.2	58	0	0	1	0	10.5	33.9	0.95	114	13	4.17	229	0.298	0	0	0	1067
074	2	65	1.57	45	18.2563	32	Aortic valve	1	negative		7.92	105	34.9	15	20.4	153.7	64	0	0	0	0	13.4	36.1	1.22	72	15.8	3.48	188	0.382	0	0	0	1068
075	1	29	1.76	51.7	16.6903	21	Tricuspid valve	1	positive	Streptococcus	18.35	113	32.9	8.3	35.6	71.7	65	0	1	0	0	13.6	33.5	1.23	70	13.7	3.92	182		0	0	0	1113
076	1	46	1.6	54	21.0938	16	Mitral valve	2	negative		11.38	81	30.8	20.3	17.3	88.8	73	0	1	0	0	11.7	36.6	1.06	89	16	4.44	165	0.443	0	0	0	1123
077	2	42	1.55	38	15.8169	20	Mitral valve	2	positive	Streptococcus	6.7	30.4	33.4	7.1	20.2	96.2	64	0	0	1	0	12.5	29.2	1.1	86	16.8	2.95	161	1.073	0	0	0	1125
078	1	50	1.69	55.5	19.4321	21	Mitral valve	2	negative		7.4	146	44.7	46.3	25.9	138.7	71	0	0	1	0	15.7	34	1.42	57	13.5	4.71	90	0.186	0	0	0	1128
079	1	33	1.65	57.7	21.1938	23	Aortic valve	1	negative		6.95	146	43.6	32	34.4	90.3	65	0	0	0	0	10.6	35.1	0.96	112	15.8	1.89	111	0.053	0	0	0	1146
080	1	35	1.7	55	19.0311	30	Aortic valve	1	negative		6.73	103	42.4	19.4	14.6	144.3	63	0	0	0	0	13.1	33.5	1.19	74	14.4	3.67	209	0.127	0	0	0	1134
081	1	44	1.66	67	24.3141	25	Aortic valve	2	negative		6.42	120	34.8	18.5	19.8	73.1	62	1	1	0	0	11	33.5	1	101	12.8	4.07	263	0.429	0	0	0	1146
082	1	30	1.65	60.7	22.2957	13	Aortic valve	1	negative		6.6	103	41.4	12.5	13.8	50.2	62	0	1	1	0	11.8	29.5	1.07	87	14.2	3.86	251	0.302	0	0	0	1161
083	1	51	1.625	54.4	20.6012	13	Aortic valve	1	negative		12.2	109	39.3	64.8	34.1	80.2	66	0	0	0	0	11.2	31.9	1.02	96	12.1	4.57	384	0.461	0	0	0	1166
084	1	44	1.625	54.4	20.6012	17	Aortic valve	1	negative		4.58	115	39.5	34.6	25.1	112.3	63	0	0	0	0	8.8	16.6	0.8	159	17.7	2.14	92	0.517	0	0	0	1169
085	1	64	1.61	57.5	22.1828	18	Aortic valve	2	negative		6.6	138	40.5	10	16.2	89.8	60	1	1	0	0	10.5	24.5	0.95	119	12.7	3.85	264	0.337	0	0	0	1185
086	2	30				25	Mitral valve	2	negative		19.1	78	29.5	31.8	28.5	114.3	74	0	1	1	0	14.3	30.1	1.3	62	15.6	1.83	32	2.529	0	1	1	387
087	1	26	1.74	70	23.1206	21	Pulmonary valve	1	negative		6.05	134	48.9	52.3	39.4	65.1	58	0	0	0	0	10.8	37.3	0.98	100	11.4	3.58	320	0.046	0	0	0	1194
088	1	63	1.62	62	23.6244	21	Aortic valve	2	negative		10.84	98	28	15.2	11.3	91.7	56	1	1	1	0	11.7	32.2	1.06	96	13.7	3.96	161	0.395	0	0	0	1195
089	1	34	1.665	61.5	22.1843	21	Mitral valve	2	negative		10.55	123	33.6	26.7	38.9	108.9	61	0	1	0	0	17.3	34	1.57	47	14.4	2.49	109	3.579	0	0	0	1201
090	1	31	1.7	69.8	24.1522	17	Aortic valve	1	negative		4.22	68	27.6	15.4	23	88.3	62	0	1	1	0	14.5	34.5	1.27	70	14.7	4.42	138	0.578	0	0	0	1201
091	1	48	1.655	53.2	19.423	26	Aortic valve	1	positive	Streptococcus	11.29	101	39.5	42.2	42.7	66.3	67	0	1	0	0	13.3	27.4	1.21	71	12	4.53	367	4.977	0	0	0	1209
092	1	49	1.7	72.5	25.0865	17	Aortic valve	2	negative		8.08	95	35.9	36.2	25	122.4	66	0	1	1	0	13.1	28.1	1.19	78	13.9	3.57	215	0.343	0	0	0	1218
093	1	30	1.795	60	18.6218	15	Pulmonary valve	2	positive	Streptococcus	5.95	93	34.3	13.8	22.6	59.1	83	0	1	1	0	12.8	39	1.16	74	14.2	1.83	97	0.036	0	0	0	1223
094	2	45	1.59	68	26.8977	18	Mitral valve	1	negative		5.2	140	41.1	12.4	16.9	60.2	66	0	0	0	0	11.5	28.7	1.04	89	14.9	2.07	115	0.165	0	0	0	1237
095	2	55	1.55	62.5	26.0146	38	Mitral and Aortic valve	2	negative		20.17	113	27.2	37.6	31.1	75	66	0	0	0	0	16	27.8	1.4	60	15	5.28	306	1.803	0	0	0	1223
096	1	55	1.6	45	17.5781	20	Mitral and Aortic valve	2	negative		9.57	80	32.6	69.3	134.5	197.4	66	1	0	0	0	13.1	34.1	1.19	78	14.3	2.67	177	6.793	0	0	0	1316
097	2	23	1.56	48	19.7239	26	Mitral valve	2	positive	Staphylococcus	9.93	111	29.4	1.36	54.3	40.6	68	0	1	0	0	13.5	32.1	1.22	68	12.5	5	225	0.518	0	0	0	1292
098	1	26	1.7	75	25.9516	21	Mitral and Aortic valve	2	negative		23.01	136	31.5	241.5	77.6	172	65	0	0	0	0	15.9	31	1.39	61	16.2	2.53	81	3.57	1	1	1	19
099	1	51	1.66	65.8	23.8786	13	Aortic valve	1	negative		8.34	64	27.3	49.7	26	145.1	45	1	0	0	0	14.3	29.7	1.25	71	17	3.37	51	2.642	0	0	0	1306
100	1	34	1.6	60.91	23.793	27	Mitral valve	1	negative		7.54	101	40.6	46.4	28.6	246	68	0	0	1	0	10.7	32.2	0.97	102	11.8	4.38	251	0.321	0	0	0	1300
101	1	20	1.82	57	17.2081	13	Aortic valve	1	negative		9.99	115	35.4	30.3	21	65.9	57	0	1	0	0	10.7	31.5	0.97	102	12.9	3.98	376	0.176	0	0	0	1316
102	1	68	1.66	68.8	24.9673	32	Aortic valve	1	negative		7.11	130	32.8	21.7	16.5	60.9	59	0	0	0	0	12.7	32.8	1.15	76	10.8	4.53	179	0.071	0	0	0	1315
103	2	57	1.47	43	19.8991	20	Mitral and Aortic valve	2	negative		5.6	109	36.8	13.7	21.6	45.5	53	0	0	0	0	10.8	32.9	1	100	13.4	3.44	381	0.523	0	0	0	1344
104	2	54	1.62	60.2	22.9386	13	Mitral valve	1	positive	Streptococcus	5.53	78	33.7	8.2	15.3	57.1	59	0	0	0	0	10.4	28.8	0.95	121	13.4	3.48	135	0.135	0	0	0	1344
105	2	67	1.495	50.1	22.4159	15	Aortic valve	2	negative		4.66	114	41.8	10.2	14.5	63.1	59	0	1	1	0	12.1	31.3	1.12	79	12.2	3.56	124	0.209	0	0	0	1362
106	1	53	1.64	75.9	28.2198	15	Mitral valve	1	negative		5.41	153	46.1	25.4	20.6	70.1	70	0	1	0	0	10.7	35.6	0.99	102	13.2	2.94	186	0.04	0	0	0	1369
107	1	48	1.615	61.9	23.7326	17	Aortic valve	1	negative		12.78	128	40.6	15.6	19.8	75.8	54	0	0	0	0	11.7	31.9	1.08	87	11.9	3.58	350	0.201	0	0	0	1369
108	1	36	1.62	71	27.0538	26	Aortic valve	2	negative		8.58	120	44.6	49.8	19.4	71.7	46	0	0	0	0	12.6	34	1.14	87	16.5	4.85	506	0.117	0	0	0	1372
109	1	51	1.66	66.4	24.0964	21	Mitral and Aortic valve	2	negative		10.97	127	39.3	27.8	19.6	69.6	60	0	1	0	0	10.8	29.4	0.98	103	13.2	4.51	314	0.763	0	0	0	1377
110	1	56	1.76	70	22.5981	23	Aortic valve	2	negative		4.78	134	41.4	17.5	18.5	95.9	64	0	0	0	0	10	27.8	0.93	126	13.8	2.87	154	0.169	0	0	0	1373
111	1	48	1.6	46.9	18.3203	31	Aortic valve	1	negative		13.51	134	34.3	43.6	37.1	58.4	43	0	1	0	0	13.9	39.2	1.26	69	13.1	4.58	595	0.404	0	0	0	1376
112	2	20	1.62	42	16.0037	26	Mitral valve	2	negative		8.13	124	39.7	6.2	11.8	46.3	69	0	0	0	0	12.4	40.6	1.14	75	14.1	2.44	220	0.046	0	0	0	1372
113	1	52	1.82	68	20.5289	32	Aortic valve	1	negative		4.53	97	31	45.9	61.2	57.4	68	0	1	0	0	13.9	37.5	1.28	61	16.1	2.63	139	0.648	0	0	0	1379
114	1	32	1.72	59	19.9432	10	Aortic valve	2	negative		10.99	129	41.7	27.3	28.8	91.1	57	0	1	0	0	14.9	33.9	1.35	67	16.3	2.71	103	0.44	0	0	0	1400
115	1	44	1.74	75.8	25.0363	26	Aortic valve	1	positive	Aspergillus flavus	6.68	145	37.6	61.4	68.4	72.7	57	0	0	0	0	10.9	28.8	0.99	102	13.3	2.37	182	0.03	0	0	1	453
116	1	43	1.605	54	20.9625	16	Mitral and Aortic valve	2	negative		5.65	75	31	14.4	30.7	257.6	69	0	0	1	0	11.7	38.7	1.06	90	15.1	2.72	224	0.181	0	0	0	1412
117	1	38	1.62	78	29.7211	42	Aortic valve	2	negative		16.74	85	27.5	102.2	109.6	151	56	1	1	0	0	15.8	33	1.45	49	15	3.28	153	0.487	0	0	0	1412
118	2	68	1.57	54.8	22.2321	26	Mitral valve	1	positive	Streptococcus	10.1	96	34.4	11.2	18.4	62.6	61	0	0	0	0	12.1	32.2	1.12	79	13.9	3.6	212	0.505	0	0	1	720
119	1	56	1.68	62	21.9671	7	Aortic valve	2	positive	Staphylococcus	13.5	89	29.7	1023	1168	373.8	58	0	1	0	1	25.2	37.9	2.29	30	20.7	1.19	84	1.886	1	1	1	8
120	2	32	1.55	48	19.9792	15	Pulmonary valve	1	positive	Streptococcus	15.41	122	36.8	26	79.6	63.9	63	0	0	0	0	13.2	30.9	1.2	81	16.3	3.4	248		0	0	0	1421
121	1	29	1.65	55	20.202	21	Aortic valve	1	negative		7	138	45	25.7	20.2	66.2	63	0	1	1	0	12.7	34.2	1.15	79	13	2.56	160	0.169	0	0	0	1421
122	1	27	1.705	61.6	21.19	27	Aortic valve	2	positive	Streptococcus	20.07	95	31.6	1117.4	1539.1	307.6	54	0	1	1	0	13.6	30.4	1.23	71	13.5	4.14	183	0.378	0	0	0	1429
123	1	54	1.67	65	23.3067	27	Mitral and Aortic valve	2	negative		5.35	121	36.2	28.9	43.6	106.2	56	0	1	1	0	14.5	36.1	1.33	57	14.2	2.69	70	0.245	0	0	0	1435
124	2	58	1.56	65	26.7094	21	Mitral valve	2	positive	Streptococcus	10.04	93	30.5	19.1	18.4	110	63	0	1	0	0	12.6	30.1	1.14	86	15.5	3.4	132	0.315	0	0	0	1428
125	1	63	1.67	58	20.7967	22	Aortic valve	1	negative		3.84	61	21.6	12.1	13.4	92.3	58	0	1	0	1	17.2	33.1	1.55	55	15.7	2.8	78	0.398	0	0	1	720
126	1	54	1.7	52.1	18.0277	20	Mitral and Aortic valve	2	positive	Streptococcus	8.75	79	28.4	37.8	33.3	61.8	58	0	1	1	0	12.9	33	1.17	77	13.7	4.08	155	0.593	0	0	0	1442
127	1	49	1.73	67	22.3863	23	Aortic valve	1	positive	Salmonella	7.26	112	35.1	53.1	20.6	68.6	64	0	1	0	0	10.2	28.3	0.93	126	11.6	4.69	221	5.447	0	0	0	1440
128	1	36	1.615	64.1	24.5761	29	Aortic valve	1	negative		12.44	122	36.3	39.2	32.7	86.3	63	1	1	0	0	13.5	35	1.22	76	14.1	2.81	234	0.265	0	0	0	1455
129	2	54	1.65	65	23.8751	35	Aortic valve	2	negative		14.14	90	31.6	87.3	37.1	68.6	70	1	1	0	1	16.4	23.1	1.48	58	13.6	2.86	119	2.824	1	1	1	32
130	2	65	1.685	73.4	25.8521	20	Mitral valve	2	negative		3.77	130	45.3	32.4	36.1	62.3	74	0	0	0	0	11.7	32.7	1.06	90	14	2.23	210	0.073	0	0	0	1468
131	1	56	1.69	74.2	25.9795	27	Aortic valve	1	negative		12.48	95	36.6	21.8	14.4	117.3	62	1	1	0	0	14.9	38.1	1.37	54	12.2	7.4	430	0.177	0	0	0	1484
132	1	60	1.73	75.8	25.3266	16	Aortic valve	2	negative		8.11	128	41.6	24.1	20	88.1	59	1	0	1	0	11.8	31.8	1.09	86	12.5	3.56	172	0.219	0	0	0	1491
133	1	44	1.54	44.8	18.8902	9	Aortic valve	2	negative		5.3	167	36.3	29.7	14.9	77.8	67	0	0	0	0	10.7	34.7	0.97	114	10.6	4.11	149	0.027	1	1	1	18
134	1	48	1.59	65	25.711	18	Tricuspid valve	1	positive	Streptococcus	8.66	107	38.1	13.3	79	99.6	63	0	1	1	0	12.3	28.9	1.14	76	12.5	3.87	260	0.553	0	0	1	1185
135	1	44	1.82	63.5	19.1704	15	Mitral valve	1	negative		4.65	125	43.2	36.7	34	69.7	65	0	1	1	0	10.8	35	1	100	14.6	3.54	148	0.095	0	0	0	1512
136	1	45	1.625	65.7	24.8805	28	Aortic valve	2	negative		8.42	63	27.6	18.4	19.5	77.6	61	0	1	0	0	14.5	37.4	1.33	57	13.4	4.26	372	0.283	0	0	0	1511
137	1	37	1.69	55	19.257	11	Aortic valve	1	negative		6.29	114	37.2	24.2	18.7	83.9	57	0	0	0	0	11.4	31.4	1.04	94	13	4.04	120		0	0	0	1517
138	1	57	1.66	51.1	18.5441	19	Aortic valve	2	negative		5.3	120	36.7	64.7	59.4	85.6	63	0	0	0	0	9.4	29.6	0.87	129	14.9	2.12	72	0.938	0	0	0	1522
139	2	31	1.62	46.5	17.7183	16	Mitral valve	2	negative		6.37	88	37.1	39.4	54.2	46.7	73	0	0	0	0	13.4	26.3	1.24	71	11	3.82	128	0.262	0	0	0	1524
140	2	48	1.61	40	15.4315	22	Mitral valve	1	negative		11.62	108	31.1	12.2	19.1	45.9	67	0	1	0	1	11.4	25.6	1.04	100	14.7	4.4	209	2.485	0	0	0	1540
141	1	46	1.63	53.6	20.1739	15	Aortic valve	1	negative		4.96	116	39.7	13.5	21.1	93.8	63	0	1	1	0	10.9	34.3	0.99	110	13.6	2.48	200	0.218	0	0	0	1568
142	2	40	1.575	52.3	21.0834	24	Mitral valve	1	negative		4.55	118	47.2	12.4	16.8	62.7	68	0	1	0	0	10.2	26.8	0.93	126	11.3	2.75	172	0.027	0	0	0	1575
143	1	38	1.65	57.5	21.1203	16	Aortic valve	2	negative		5	116	38.7	34.5	31.5	92.9	51	0	1	1	0	10.6	32.5	0.98	103	13.1	2.08	99	0.171	0	0	0	1585
144	1	58	1.7	62.5	21.6263	16	Mitral valve	2	positive	Streptococcus	10.98	93	29.8	24.2	21.1	107.6	70	0	1	0	0	13.5	34.1	1.22	76	12.5	4.11	207	0.347	0	0	0	1585
145	1	56	1.67	68	24.3824	22	Mitral valve	1	negative		12.63	121	36	30.1	19.5	86.3	74	1	1	0	1	11.7	33	1.08	87	11.4	5.49	108	0.059	0	0	0	1588
146	2	32	1.555	47.7	19.7268	16	Mitral valve	1	negative		4.92	105	45	15.6	17	68.9	65	0	1	0	1	8.9	25.4	0.76	90	18.4	3.77	215		0	0	0	1599
147	2	61	1.53	55	23.4952	49	Aortic valve	1	positive	Streptococcus	3.31	90	30.5	28.7	42.2	57.2	71	1	0	1	0	11.8	34.8	1.09	83	13.7	3.12	44	1.125	0	0	0	1581
148	1	33	1.705	51.8	17.8189	14	Mitral valve	1	positive	Abiotrophia defectiva	4.54	111	45.5	32	29.1	124	64	0	1	0	0	12.6	35.7	1.16	73	12.8	2.43	170	0.217	0	0	0	1607
149	2	63	1.47	51.5	23.8327	39	Aortic valve	2	negative		8.48	124	33	175.7	115	100.6	57	0	0	0	0	17.8	34	1.6	48	15.4	1.24	120	2.192	0	1	1	193
150	1	52	1.67	68.2	24.4541	35	Aortic valve	2	positive	Streptococcus	12.29	115	37.1	18.5	14	64.4	57	1	0	0	0	11.2	27.9	1.04	94	10.8	3.82	247	0.065	0	0	0	1595
151	1	51	1.675	66	23.5242	19	Aortic valve	2	negative		6.3	103	35.6	9.6	8.1	77.9	64	0	1	0	0	9.5	28.7	0.87	146	12.4	3.36	274	0.146	0	0	0	1610
152	2	38	1.55	48.3	20.1041	15	Aortic valve	2	negative		6.3	81	42.9	24	19.8	55.1	59	1	1	0	0	9.3	28.6	0.85	135	13.7	2.13	218	0.224	0	0	0	1614
153	1	65	1.76	64	20.6612	22	Aortic valve	2	negative		6.93	99	34.2	10.9	11	178.4	57	0	0	0	0	10.8	32.6	0.93	105	23	3.59	227	1.05	0	0	0	1621
154	1	52	1.68	62.5	22.1443	21	Aortic valve	2	negative		4.23	131	37.5	6	10.8	88.9	52	0	0	0	0	11.1	37.5	0.96	99.2	20.8	2.35	152	0.64	0	0	0	1628
155	1	51	1.7	65	22.4913	24	Aortic valve	1	positive	Streptococcus	16.24	134	33.4	13.5	15.3	93.1	65	0	0	0	0	12	29	1.04	86	18	4.28	391	1.19	0	0	0	1621
156	1	27	1.77	72	22.9819	24	Mitral valve	1	positive	Streptococcus	5.73	121	39.7	16.5	26.6	75.1	73	0	1	0	1	12.5	31.8	1.07	84.6	18.9	2.42	48	1.09	0	0	0	1627
157	2	22	1.52	45.1	19.5204	33	Mitral valve	1	negative		29.22	84	39.9	11.8	9.9	70.2	42	0	1	0	0	13.9	35.9	1.21	62.8	13.4	5.29	260	0.27	0	0	0	1639
158	1	60	1.46	47	22.0492	9	Aortic valve	2	negative		6.87	119	39.5	9.2	18.3	111.1	19	0	0	0	0	24.1	40.4	2.1	27.2	19.3	3.19	169	0.08	0	1	1	75
159	1	32	1.57	45.5	18.4592	19	Aortic valve	2	positive	Streptococcus	8.6	103	28.3	20.1	26.3	75	62	0	0	0	0	11.2	33	0.96	97	21.7	3.84	313	1.7	0	0	0	1643
160	1	51	1.67	67	24.0238	19	Mitral and Aortic valve	2	negative		8.42	90	37.4	16	20.1	118.3	66	0	0	0	1	12.5	29.5	1.08	79.9	16.8	4.81	211	0.83	0	0	0	1642
161	1	30	1.695	54.3	18.8999	18	Aortic valve	2	positive	Streptococcus	11.5	101	36	35.8	15.5	84.1	66	0	1	1	0	8.7	37.6	0.74	180	21.4	5.93	360	0.87	0	0	0	1659
162	2	28	1.43	46.2	22.5928	22	Mitral valve	1	negative		7.47	92	39.7	9.7	15.9	71.4	71	0	1	0	0	9.3	44.8	0.79	140	23.9	5.65	339	0.71	0	0	0	1657
163	2	47	1.63	70	26.3465	11	Aortic valve	1	negative		11.77	122	37.4	18.5	27.2	808.3	48	0	0	0	1	19.6	28.9	1.73	64	14.9	4.44	73	0.12	0	0	0	1503
